# Supplementary material for: Direct and quantitative detection of dicyandiamide (DCD) in milk using surface-enhanced Raman spectroscopy
Source: Royal Society of Chemistry journal article supplement (doi:10.1039/c5ay00313j), 2015-01-01
Supplement: c5ay00313j1.pdf [file c5ay00313j1.pdf]

# **Direct and quantitative detection of dicyandiamide (DCD) in milk using surface enhanced Raman spectroscopy**

Xiang Lin,<sup>a</sup> Wu-Li-Ji Hasi,<sup>\*a</sup> Xiu-Tao Lou,<sup>a</sup> Siqingaowa Han,<sup>b</sup> Dian-Yang Lin,<sup>\*a</sup> Zhi-Wei Lu<sup>\*a</sup>

<sup>a</sup> *National Key Laboratory of Science and Technology on Tunable Laser, Harbin Institute of Technology Harbin150080, China;*

<sup>b</sup> *Affiliated Hospital of Inner Mongolia University for the Nationalities, Inner Mongolia Tongliao 028007, China)*

## **Supplementary Information**

In order to determine the enhancement factor (EF) of silver colloid for detecting DCD in water, normal Raman spectrum of  $4 \times 10^{-2}$  g/mL DCD aqueous solution and SERS spectrum of  $5 \times 10^{-6}$  g/mL DCD aqueous solution under alkaline condition were recorded respectively (Fig. S2). It's worth noting that the actual concentration of DCD in solution subjected SERS measurement is  $4 \times 10^{-6}$  g/mL due to the dilution by silver colloid and aggregate agents. The enhancement factor of silver colloid was calculated according to the following equation:

$$EF = \frac{I_{SERS}}{I_{NR}} \times \frac{C_{NR}}{C_{SERS}} \quad (1)$$

$I_{SERS}$  is the intensity of the selected band at  $926 \text{ cm}^{-1}$  obtained by SERS,  $I_{NR}$  is the corresponding band intensity of the normal Raman spectrum.  $C_{SERS}$  and  $C_{NR}$  are the sample concentrations in the SERS and normal Raman measurements, respectively. Based on the characteristic peaks at around  $926 \text{ cm}^{-1}$ , according to Eq. (1), an approximately  $2.88 \times 10^5$  fold of signal enhancement in the SERS spectrum was achieved.

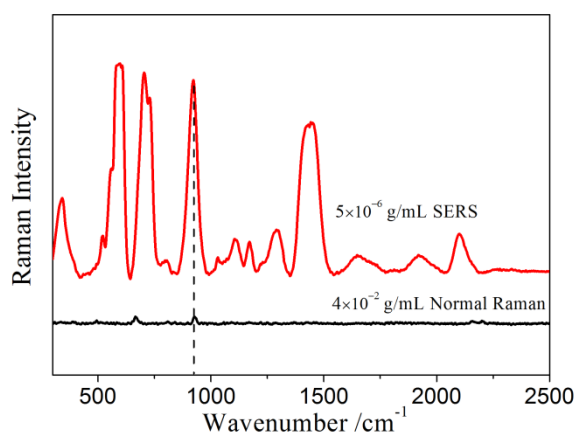

**Figure S1.** SERS spectrum of  $5 \times 10^{-6}$  g/mL DCD in water under alkaline condition (top red line) and normal Raman spectrum of  $4 \times 10^{-2}$  g/mL DCD in water (bottom black line). (Offset for clarity, same scale).

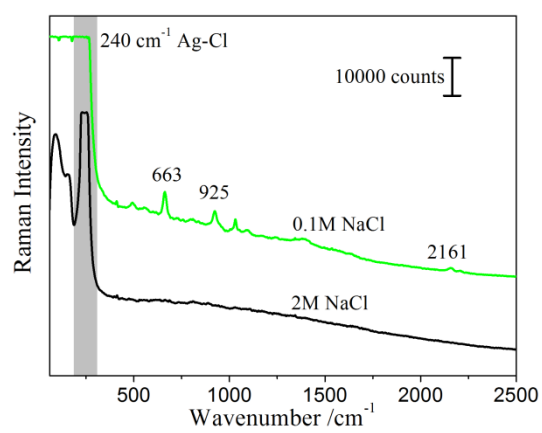

**Figure S2.** SERS spectra of DCD solution using NaCl as aggregating agent with different concentrations (0.1M and 2M).
